# Supplementary material
Source: PubMed Central journal article supplement (PMC4148792)
Supplement: AEM.00670-14_zam999105509so1.pdf [file AEM.00670-14_zam999105509so1.pdf]

**Table S1.** mRNA abundance of *Gs* beta-oxidation genes when the fungus is grown on oleic acid (YNB+OC) or monoterpene mixture (YNB+MT) as single carbon. \* indicates genes that are significantly up-regulated (  $P < 0.05$  )

| Gene ID         | Gene description                                | YNB+OC | YNB+MT    |
|-----------------|-------------------------------------------------|--------|-----------|
| <i>CMQ_5823</i> | 3-hydroxyacyl-CoA dehydrogenase                 | 1.23   | 2.14 *    |
| <i>CMQ_3893</i> | enoyl-coA hydratase                             | 15.75* | 1.89*     |
| <i>CMQ_1252</i> | 3-ketoacyl-CoA thiolase peroxisomal a precursor | 17.28* | -1.02     |
| <i>CMQ_5429</i> | acyl-dehydrogenase domain containing protein    | 24.18* | 1.08      |
| <i>CMQ_3456</i> | acyl-CoA dehydrogenase                          | 3.08*  | 3.45*     |
| <i>CMQ_3669</i> | short chain dehydrogenase reductase             | 12.79* | 1.01      |
| <i>CMQ_2282</i> | 3-ketoacyl-ketothiolase                         | 12.26* | -1.47     |
| <i>CMQ_5806</i> | enoyl-hydratase isomerase family protein        | 34.47* | 4.71*     |
| <i>CMQ_8299</i> | acyl-dehydrogenase domain containing protein    | 13.27* | 1,482.13* |
| <i>CMQ_2938</i> | acetyl-CoA c-acyltransferase                    | 4.4*   | 1.37*     |
| <i>CMQ_2559</i> | acyl-dehydrogenase domain containing protein    | 15.83* | 2.76*     |
| <i>CMQ_2556</i> | acyl-dehydrogenase domain containing protein    | 18.07* | 1.08      |
| <i>CMQ_7074</i> | 3-ketoacyl-thiolase                             | 2.22*  | 2.84      |

**Table S2.** Protein IDs of the 24 fatty acid metabolic proteins used in the manuscript

| Species                    | ID           | Description                         |
|----------------------------|--------------|-------------------------------------|
| <i>Magnaporthe grisea</i>  | MGG_01551    | long-chain-fatty-acid-CoA ligase 1  |
| <i>Magnaporthe grisea</i>  | MGG_08661    | acyl-CoA dehydrogenase              |
| <i>Magnaporthe grisea</i>  | MGG_12868    | enoyl-CoA hydratase                 |
| <i>Magnaporthe grisea</i>  | MGG_09512    | 3-ketoacyl-CoA thiolase             |
| <i>Magnaporthe grisea</i>  | MGG_01755    | acetyl-CoA acetyltransferase        |
| <i>Laccaria bicolor</i>    | 189447       | Acylcarnitine transferase           |
| <i>Laccaria bicolor</i>    | 191220       | Acyl-CoA dehydrogenase              |
| <i>Laccaria bicolor</i>    | 301012       | Carnitine/acylcarnitine translocase |
| <i>Laccaria bicolor</i>    | 234621       | Enoyl-CoA hydratase                 |
| <i>Laccaria bicolor</i>    | 319094       | Long-chain FA-CoA ligase            |
| <i>Laccaria bicolor</i>    | 185981       | 3-ketoacyl-CoA thiolase             |
| <i>Laccaria bicolor</i>    | 187873       | 3-hydroxyacyl-CoA dehydrogenase     |
| <i>Laccaria bicolor</i>    | 188234       | Acetylcarnitine transferase         |
| <i>Laccaria bicolor</i>    | 319093       | Acyl-CoA oxidase                    |
| <i>Laccaria bicolor</i>    | 234865       | peroxisomal multifunctional protein |
| <i>Laccaria bicolor</i>    | 242594       | peroxisomal ABC transporter 1       |
| <i>Laccaria bicolor</i>    | 141760       | peroxisomal ABC transporter 2       |
| <i>Laccaria bicolor</i>    | 301021       | 3-ketoacyl-CoA thiolase             |
| <i>Laccaria bicolor</i>    | 317084       | dependent isocitrate dehydrogenase  |
| <i>Yarrowia lipolytica</i> | YALI0F23749  | glutaryl-CoA dehydrogenase          |
| <i>Yarrowia lipolytica</i> | YALI0F04095p | isocitrate dehydrogenase            |
| <i>Yarrowia lipolytica</i> | YALI0E34672p | mitochondrial citrate transporter)  |
| <i>Yarrowia lipolytica</i> | YALI0E09405  | peroxin-14                          |
| <i>Yarrowia lipolytica</i> | YALI0C16885  | socitrate lyase                     |

**Table S3.** Proposed (+)-limonene degradation intermediates and the potential enzymes involved in the conversion

| Reaction step | Compound name                                     | Compound structure                                                                                                                                                               | Enzymes                                                         | Fold changes | Remarks                                                              |
|---------------|---------------------------------------------------|----------------------------------------------------------------------------------------------------------------------------------------------------------------------------------|-----------------------------------------------------------------|--------------|----------------------------------------------------------------------|
| 1             | Limonene                                          | 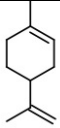                                                                                                | FAD-binding monooxygenase (CMQ_6740) or P450                    | 7099         | Jeffery is the natural mutant                                        |
| 2             | Limonene 1,2-epoxide                              |                                                                                                 | Epoxide hydrolase (CMQ_7009) or $\alpha$ - $\beta$ hydrolase(s) | 28.31        | Found in Metabolite Mutant gives the phenotype (partially)           |
| 3             | Limonene -1,2-diol                                |                                                                                                 | DCPIP type dehydrogenase (CMQ_238)                              | 39.48        | Found in Metabolite                                                  |
| 4             | (1S,4R)-1-Hydroxy-2-oxolimonene                   |                                                                                                 | Baeyer-Villager monooxygenase (CMQ_6956)                        | 356          | Found in metabolite. Mutant gives the phenotype                      |
| 5             | 7-hydroxy-4-isopropenyl-7-menthyl-2-oxo-oxepanone |                                                                                                | Spontaneous reaction                                            |              | Found in metabolite (derivatised sample)                             |
| 6             | (3R)-3-Isopropenyl-6-oxoheptanoate                | <br>or<br> | Baeyer-Villager monooxygenase (CMQ_7007)                        | 2571         | Found in metabolite (derivatised sample). Mutant gives the phenotype |
| 7             | 3-(2-acetoxyethyl)-4-methylpent-4-enoic acid      |                                                                                               | Lipase esterase (CMQ_6642)                                      | 429          | Break C10 to C8                                                      |
| 8             | 3-(2-hydroxyethyl)-4-methylpent-4-enoic acid      |                                                                                               | Alcohol dehydrogenase (CMQ_8234)                                | 2956         |                                                                      |
| 9             | 4-methyl-3-(2-oxoethyl)pent-4-enoic acid          |                                                                                               | Aldehyde dehydrogenase (CMQ_6937)                               | 279          |                                                                      |
| 10            | 3-(prop-1-en-2-yl)pentanedioic acid               |                                                                                               | Ligase (CMQ_4361)                                               | 2.08         |                                                                      |
| 11            | 3-isopropenyl-glutaryl-coA                        |                                                                                               | Acyl CoA-dehydrogenase (CMQ_8299)                               | 1482         |                                                                      |
| 12            | 3-isopropenyl-glutaconyl-coA                      |                                                                                               | enoyl-coA hydratase (CMQ_4626)                                  | 3.29         | Beta-oxidation gene                                                  |

|    |                                        |                                                                                   |                                                      |       |                                           |
|----|----------------------------------------|-----------------------------------------------------------------------------------|------------------------------------------------------|-------|-------------------------------------------|
| 13 | 3-hydroxy-3-isopropenyl-glutaconyl-coA | 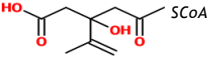 | Hydroxymethylglutaryl-CoA lyase (CMQ_8094)           | 18483 | Breaking C8 to C6                         |
| 14 | 4-methyl-4-pentenoyl-coA               |  | 3-ketoacyl-thiolase (CMQ_7074)                       | 2.84  | Beta-oxidation gene                       |
| 15 | Mecharylyl-CoA                         |  | Crotonase (CMQ_613)                                  | 6.39  | Intermediate of valine catabolism pathway |
| 16 | Beta-hydroxyisobutyryl-CoA             |  | 3-hydroxyisobutyryl-CoA hydrolase (CMQ_4626)         | 3.29  | Valine catabolism pathway                 |
| 17 | Beta-hydroxyisobutyric acid            |  | 3-hydroxyisobutyrate dehydrogenase (CMQ_4029)        | 23.08 | Valine catabolism pathway                 |
| 18 | Methylmalonic acid                     |  | Methylmalonate-semialdehyde dehydrogenase (CMQ_3621) | 22.39 | Valine catabolism pathway                 |
| 19 | Propionyl-CoA                          |  |                                                      |       | Precursor of TCA cycle                    |
